1 Article

# 2 Understanding Suicide in Our Community Through 3 the Lens of the Pediatric ICU: An Epidemiological 4 Review (2011-2017) of One Midwestern City in the 5 US

6 Andrew Kampfschulte<sup>1</sup>, Matthew Oram<sup>2</sup>, Alejandra M. Escobar Vasco<sup>2</sup>, Brittany Essenmacher<sup>3</sup>,  
7 Amy Herbig<sup>2</sup>, Aniruddh Behere<sup>2,4</sup>, Mara L. Leimanis-Laurens<sup>2,3\*</sup>, Surender Rajasekaran<sup>1,2,3</sup>

8

9 <sup>1</sup>Office of Research and Education, Spectrum Health, 15 Michigan Street NE, Grand Rapids, MI, United States

10 <sup>2</sup>Department of Pediatrics and Human Development, College of Human Medicine, Michigan State  
11 University, Life Sciences Building, 1355 Bogue Street, East Lansing, MI, 48824

12 <sup>3</sup>Pediatric Intensive Care Unit, Helen DeVos Children's Hospital, 100 Michigan Street NE, Grand 16 Rapids,  
13 MI, 49503

14 <sup>4</sup>Pediatric Behavior Health, Helen DeVos Children's Hospital, 100 Michigan Street NE, Grand 14 Rapids, MI,  
15 49503

16

17 \* Correspondence: [mara.leimanis@spectrumhealth.org](mailto:mara.leimanis@spectrumhealth.org); Tel.: +1-616-267-0106

18 Received: date; Accepted: date; Published: date

19 **Abstract:** Suicide frequency has tripled for some pediatric age groups over the last decade, of  
20 which, serious attempts result in pediatric intensive care unit (PICU) admissions. We paired clinical,  
21 aggregate geospatial, and temporal demographics to understand local community variables to  
22 determine if epidemiological patterns emerge that associate with risk for PICU admission. Data  
23 was extracted at an urban, high-volume, quaternary care facility from January 2011 to December  
24 2017 via ICD 10 codes associated with suicide. Clinical, socioeconomic, geographical, and temporal  
25 variables were reviewed. 1,036 patients over age 9 were included, of which n=161 were PICU  
26 admissions. Females represented higher proportions of all suicide-related hospital admissions  
27 (67.9%). Looking at race/ethnicity, PICU admissions were largely Caucasian (83.2%); Blacks and  
28 Hispanics had lower odds of PICU admissions (OR: 0.49; 0.17, respectively). PICU-admitted patients  
29 were older (16.0 vs. 15.5; p=0.0001), with lower basal metabolic index (23.0 vs. 22.0; p=0.0013), and  
30 presented in summer months (OR: 1.51, p = 0.044). Time-series decomposition showed seasonal  
31 peaks in June and August. Local regions outside city limits identified higher numbers of PICU  
32 admissions. PICUs serve discrete geographical regions and are a source of information, when  
33 paired with clinical-geospatial/seasonal analyses, highlighting clinical and societal risk factors  
34 associated with PICU admissions.

35 **Keywords:** suicide; pediatrics; critical care; geospatial; temporal; self-directed violence.

36

## 37 1. Introduction

38 Suicide is defined by the Centers for Disease Control as death caused by injuring oneself with  
39 the intent to die and is part of a broader class of behaviors called self-directed violence, that is a  
40 behavior that could result in immediate injury and has potential for lasting injury [1]. A serious  
41 suicide attempt (SSA) is one that would result in death without specialized intervention (surgery,  
42 antidotes, intensive care unit (ICU) admission, prolonged hospitalization), and can be considered a  
43 ~~NOTE: This preprint reports new research that has not been certified by peer review and should not be used to guide clinical practice.~~

44 two groups may be summarized as: those requiring hospitalization for observation versus those  
45 facing potential injury or risk of mortality, thus requiring an ICU admission.

46 Suicide is a major and ongoing public health concern in the United States (US). Current data  
47 demonstrates that death by suicide is the second leading cause of mortality in people age 15-24 years  
48 [3,4]. Suicide affects young people from all races and socioeconomic groups. Rates of suicide have  
49 increased since the turn of the century in both adults and children [3]. From 1999-2014, the rate of  
50 suicide for children age 10-14 tripled, helping to drive the overall increase in rate of suicide across all  
51 ages during the same time period [5].

52 Children's hospitals serve distinct geographical areas, where patients needing highly advanced  
53 care are sent to their regional ICU. We are the only pediatric ICU (PICU) in a city of above 200,000  
54 residents with a catchment area that includes one million residents. Patients that originate from these  
55 regions are being exposed to a unique set of socioeconomic, geographical, and temporal factors that  
56 need better understanding and characterization.

57 In this retrospective chart review, we extracted clinical and community variables available  
58 in the electronic medical record (EMR) to develop a more complete understanding of factors that  
59 associate with PICU admission (non-ICU hospitalized patients were used as our comparative-control  
60 group). We hypothesized that since PICUs serve distinct regions, an analysis of the variables  
61 extracted from the EMR could assist in developing an understanding of clinical, socioeconomic,  
62 geographical [6,7], and temporal (yearly, seasonal, time of day, *-of incident*) [8], demographics for our  
63 region. The results presented herein are intended for PICU staff, pediatricians, social workers,  
64 chaplains, suicide researchers, parents, educators, psychologists, those working in adolescent  
65 community outreach, and mental health fields.

## 66 2. Materials and Methods

### 67 2.1 Site and Population

68 The study and data collection were conducted at Helen DeVos Children's Hospital (HDVCH)  
69 located in Grand Rapids, MI. HDVCH PICU is a mixed cardiac surgery and medical intensive care  
70 unit with approximately 1600 annual admissions, with over 6,000 patient days. Seventeen board  
71 certified intensivists provide 24-hour coverage for a 24-bed unit, with maximum capability of 36  
72 critically ill children.

73 Patients included in our study were between 9 and 18 years of age admitted to HDVCH between  
74 January 2011 to December 2017. Medical records were manually screened retrospectively for possible  
75 suicide-related diagnoses and admission keywords (overdose, poisoning, ingestion, intoxication,  
76 suicide attempt, or altered mental status). Relevant indications for ICU admission included  
77 respiratory failure, significant risk for respiratory failure, depressed mental status, seizures,  
78 cardiovascular dysfunction, and risk of arrhythmias. We excluded patients < 9 years and > 18 years  
79 of age, with developmental delays, and patients where intent of suicide was difficult to establish.  
80

### 81 2.2 Variables

82  
83 Data extracted from HDVCH's EMR included categorical variables: suicide category (drowning,  
84 hanging/strangling, poison, drug overdose, gas, cutting, fall by height), race of patients (African  
85 American, Caucasian, Hispanic, other), and type of insurance (unknown, commercial, government),  
86 discharge disposition (home, psychiatric/rehab, expired, other). Binary variables included sex  
87 (dummy variable: male =0; female=1), admission through the emergency department (ED) (Yes =1/  
88 No=0), hospital death (Yes=1/No=0), death (Yes=1/No=0); numerical variables included basal  
89 metabolic index (BMI), age of the patient (years), and length of stay (LOS), median income  
90 (Supplemental Table 1). Severity of illness scores included pediatric risk of mortality III (PRISM III)  
91 score [9], and Pediatric Index of Mortality (PIM2) [10], both calculated during the first hours of ICU  
92 admission.

93 Temporal variables were computed based on a patient's hospital admission date and time.  
94 Seasonality was qualified as school session: *either school year or summer vacation*. The months June,  
95 July, and August were assumed as general summer vacation months for the study population (School  
96 Session = *Summer Vacation*), while the remaining months were considered as school year months  
97 (School Session = *School Year*). Furthermore, the day of week of the hospital admission was used to  
98 determine whether the admission occurred on a weekend or a weekday; time of admission was  
99 defined as: office hours (7:30 a.m. – 5:30 p.m.) versus, night hours (5:30 p.m. – 7:30 a.m.) [11,12].

100 The patient-level data was supplemented with zip code-aggregated data from the U.S. Census  
101 Bureau's 2017 5-year American Community Survey estimates, and included median household  
102 income, various demographic and socioeconomic variables [13].

### 103 104 2.3 Statistical Analyses

105  
106 Quantitative data are expressed as median  $\pm$  interquartile range. Qualitative data are expressed  
107 as frequency (percent). Group comparisons between hospitalized PICU and non-PICU admitted  
108 cases for numeric data were implemented using Mann-Whitney U-Tests; qualitative comparisons  
109 were made using Fisher's Exact Tests. *P*-value of  $<0.05$  was considered statistically significant.

110 Modeling the odds of PICU admission was performed using a binomial logistic regression  
111 model [14]. With the large skew between PICU and non-PICU admissions, a multivariable model was  
112 selected prioritizing model parsimony to prevent over-fitting and complete model separation.

113 Zip code tabulation areas (ZCTAs) shapefiles were obtained using the tigris package offered in  
114 R statistical software [15]. These shapefiles are pulled from the U.S. Census Bureau's TIGER database.  
115 Frequencies for PICU and non-PICU suicide-related admissions were then calculated for each zip  
116 code and standardized based on the U.S. Census Bureau's 2017 ACS estimates of middle school and  
117 high school enrollment to calculate the frequency per 1,000 students [12]. Additional zip-code level  
118 information (rural population, percent of family homes, and housing unit estimates) were obtained  
119 through the Integrated Public Use Microdata Series (IPUMS) National Historical Geographic  
120 Information System [16]. This information was then used to create bivariate choropleth maps in R  
121 [17,18], using median values to classify intensity. Relative PICU admissions were calculated for all  
122 ZCTAs as the count of standardized PICU admissions divided by the total combined count of  
123 standardized PICU and non-PICU admissions and given as a percent (Supplemental Figs 2-4). This  
124 allowed for an exploratory approach to examine spatial relationships between the observed zip code  
125 suicide-related admissions and aggregate-level demographic information. All analyses were  
126 performed in R version 3.6.0 [14].

127 Given the temporal component of the data (suicide-related admissions over time), basic seasonal  
128 decomposition was performed using an equidistant moving average and average values at time  
129 points to explore seasonality.

## 130 3. Results

### 131 3.1 Demographics

132 Patients included in the analysis from 1,036, were hospitalized (n=875), and those with a PICU  
133 admission (n=161). Initial findings from the demographic analysis revealed statistically significant  
134 differences between the patients who were hospitalized versus those admitted to the PICU (Table 1),  
135 including: age, race, BMI, discharge disposition, LOS, mortality, school session, and time of day of  
136 incident. Age was strongly related to PICU admission; median age of PICU-admitted patients being  
137 16 years and non-PICU-admitted patients having a median age of 15.5 years ( $p = 0.001$ ) (Figure 1).  
138 Although not statistically significant, females consistently appeared more frequently in both PICU  
139 and non-PICU admissions (64 %, 68.6 %, respectively). Race/ethnicity yielded significant associations  
140 with PICU admissions ( $p=0.002$ ), as evident in the predominant Caucasian PICU admissions (83 %).  
141 Patients admitted to the PICU had lower median BMIs (22.0 vs 23.0,  $p = 0.006$ ). The suicide category  
142 did not strongly associate with PICU admissions ( $p=0.745$ ). A larger number of non-PICU patients

143 were discharged home after their hospitalization ( $p = <0.001$ ), spent less time in the hospital (1.6 vs.  
144 1.9;  $p = <0.001$ ), and were more likely to survive their hospitalization ( $p = 0.038$ ). In terms of  
145 temporality, non-PICU admissions were higher during the school year ( $p = 0.045$ ) and night hours ( $p$   
146  $= 0.044$ ).

147

148

149

**Table 1: Total Patient Demographics**

| Variable         | Levels                 | Missing N | No PICU    | PICU       | Total       | <i>p</i>         |
|------------------|------------------------|-----------|------------|------------|-------------|------------------|
| Total N (%)      |                        |           | 875 (84.5) | 161 (15.5) | 1036        |                  |
| Age              | Median (IQR)           | 0         | 15.5 (2.6) | 16.0 (2.4) | 15.6 (2.5)  | <b>0.001</b>     |
| Gender           | Female                 | 0         | 600 (68.6) | 103 (64.0) | 703 (67.9)  | 0.271            |
|                  | Male                   |           | 275 (31.4) | 58 (36.0)  | 333 (32.1)  |                  |
| Race             | White                  | 0         | 609 (69.6) | 134 (83.2) | 743 (71.7)  | <b>0.002</b>     |
|                  | Black                  |           | 90 (10.3)  | 10 (6.2)   | 100 (9.7)   |                  |
|                  | Hispanic               |           | 86 (9.8)   | 5 (3.1)    | 91 (8.8)    |                  |
|                  | Other                  |           | 90 (10.3)  | 12 (7.5)   | 102 (9.8)   |                  |
| BMI              | Median (IQR)           | 116       | 23.0 (8.0) | 22.0 (5.0) | 23.0 (7.3)  | <b>0.006</b>     |
| ED Admission     | Non-ED                 | 0         | 435 (49.7) | 68 (42.2)  | 503 (48.6)  | 0.086            |
|                  | ED                     |           | 440 (50.3) | 93 (57.8)  | 533 (51.4)  |                  |
| Discharge Disp.  | Home                   | 0         | 320 (36.6) | 31 (19.3)  | 351 (33.9)  | <b>&lt;0.001</b> |
|                  | Psychiatric/Rehab      |           | 533 (60.9) | 121 (75.2) | 654 (63.1)  |                  |
|                  | Expired                |           | 4 (0.5)    | 3 (1.9)    | 7 (0.7)     |                  |
|                  | Other                  |           | 18 (2.1)   | 6 (3.7)    | 24 (2.3)    |                  |
| LOS (days)       | Median (IQR)           | 0         | 1.6 (1.5)  | 1.9 (1.7)  | 1.6 (1.6)   | <b>&lt;0.001</b> |
| Insurance Type   | Unknown                | 0         | 16 (1.8)   | 1 (0.6)    | 17 (1.6)    | 0.681            |
|                  | Commercial             |           | 781 (89.3) | 145 (90.1) | 926 (89.4)  |                  |
|                  | Government             |           | 78 (8.9)   | 15 (9.3)   | 93 (9.0)    |                  |
| Suicide Category | Ingestion              | 0         | 580 (66.3) | 106 (65.8) | 686 (66.2)  | 0.745            |
|                  | Hanging/Strangulation  |           | 7 (0.8)    | 3 (1.9)    | 10 (1.0)    |                  |
|                  | Suicidal Ideation      |           | 95 (10.9)  | 17 (10.6)  | 112 (10.8)  |                  |
|                  | Other/Self Harm        |           | 28 (3.2)   | 4 (2.5)    | 32 (3.1)    |                  |
|                  | Self-Harm not Apparent |           | 165 (18.9) | 31 (19.3)  | 196 (18.9)  |                  |
| Hospital Death   | Survived               | 0         | 871 (99.5) | 158 (98.1) | 1029 (99.3) | 0.080            |

|                     |                 |        |                      |                      |                      |              |
|---------------------|-----------------|--------|----------------------|----------------------|----------------------|--------------|
|                     | Expired         |        | 4 (0.5)              | 3 (1.9)              | 7 (0.7)              |              |
| Death               | Survived        | 0      | 867 (99.1)           | 156 (96.9)           | 1023 (98.7)          | <b>0.038</b> |
|                     | Expired         |        | 8 (0.9)              | 5 (3.1)              | 13 (1.3)             |              |
| Weekday/<br>Weekend | Weekday         | 0      | 662 (75.7)           | 124 (77.0)           | 786 (75.9)           | 0.764        |
|                     | Weekend         |        | 213 (24.3)           | 37 (23.0)            | 250 (24.1)           |              |
| School Session      | School Year     | 0      | 674 (77.0)           | 112 (69.6)           | 786 (75.9)           | <b>0.045</b> |
|                     | Summer Vacation |        | 201 (23.0)           | 49 (30.4)            | 250 (24.1)           |              |
| Time of Day         | Night Hours     | 0      | 645 (73.7)           | 106 (65.8)           | 751 (72.5)           | <b>0.044</b> |
|                     | Office Hours    |        | 230 (26.3)           | 55 (34.2)            | 285 (27.5)           |              |
| Median Income       | Median (IQR)    | 56 (%) | 49428.0<br>(18162.0) | 50232.0<br>(20163.2) | 49428.0<br>(18160.0) | 0.097        |

150 *Note: Categorical data is expressed as frequency (percent) and analyzed via Fisher's Exact Test; Numeric data*  
 151 *are expressed as median ± interquartile range and analyzed via Mann-Whitney U-Test. P-value of <0.05 was*  
 152 *considered statistically significant. BMI: basal metabolic index; Discharge Disp: discharge disposition;*  
 153 *ED: emergency department; IQR: inter-quartile range; LOS: length of stay; PICU: pediatric*  
 154 *intensive care unit.*  
 155

156 **Figure 1.** Observed Age Distribution of PICU and Non-PICU Patients (2011-2017)

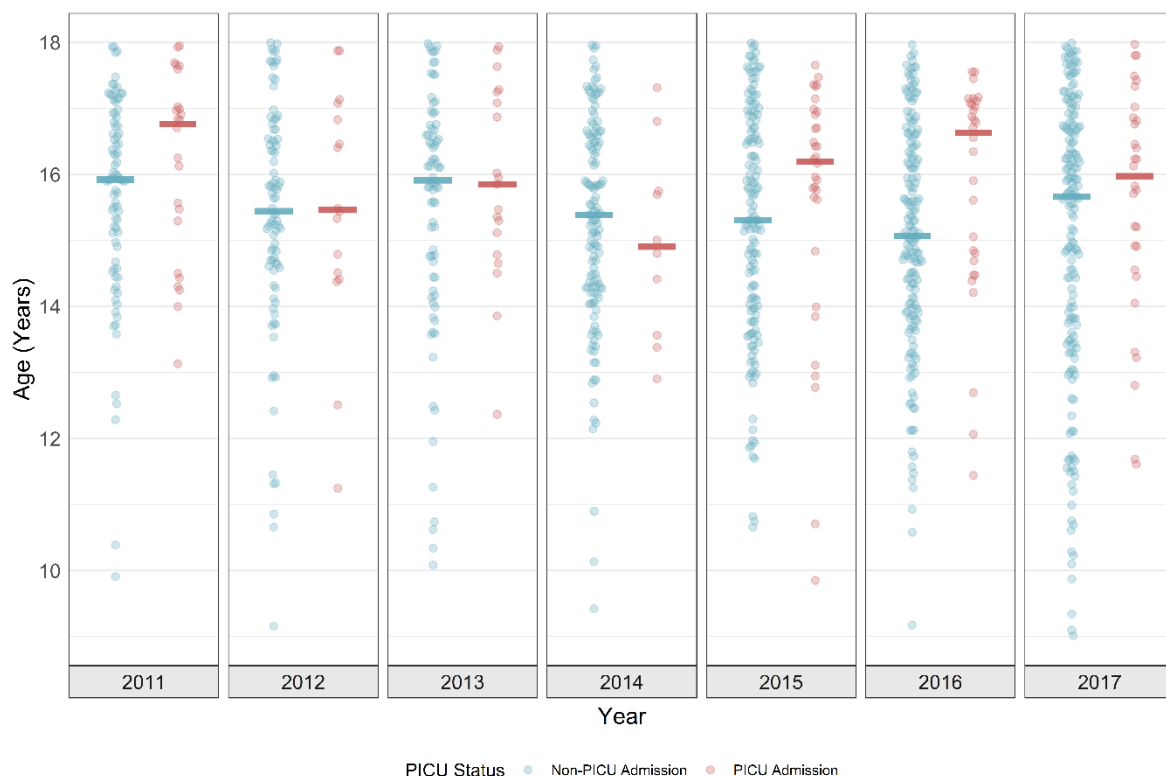

158 3.2. Logistic Regression

159

160

161

162

163

164

165

A binomial logistic regression was run to predict PICU admission while controlling for other covariates. All relevant covariates were assessed in individual univariate models, and a stepwise selection method was used to create a multivariable model while prioritizing model parsimony by minimizing Akaike Information Criterion (AIC) (Table 2).

**Table 2:** Results of Logistic Regression Analysis for PICU and Non-PICU admissions

| Dependent:       |                        | No PICU    | PICU       | OR (univariable)                  | OR (multivariable)                |
|------------------|------------------------|------------|------------|-----------------------------------|-----------------------------------|
| PICU Admission   |                        |            |            |                                   |                                   |
| Age              | Mean (SD)              | 15.2 (1.8) | 15.7 (1.7) | 1.17 (1.06-1.30, <b>p=0.003</b> ) | 1.20 (1.08-1.35, <b>p=0.001</b> ) |
| Gender           | Female                 | 600 (85.3) | 103 (14.7) | -                                 | -                                 |
|                  | Male                   | 275 (82.6) | 58 (17.4)  | 1.23 (0.86-1.74, p=0.252)         | -                                 |
| Race             | White                  | 609 (82.0) | 134 (18.0) | -                                 | -                                 |
|                  | Black                  | 90 (90.0)  | 10 (10.0)  | 0.50 (0.24-0.95, <b>p=0.049</b> ) | 0.53 (0.24-1.05, p=0.091)         |
|                  | Hispanic               | 86 (94.5)  | 5 (5.5)    | 0.26 (0.09-0.60, <b>p=0.005</b> ) | 0.19 (0.05-0.51, <b>p=0.005</b> ) |
|                  | Other                  | 90 (88.2)  | 12 (11.8)  | 0.61 (0.31-1.10, p=0.120)         | 0.62 (0.30-1.17, p=0.166)         |
| BMI              | Mean (SD)              | 24.7 (6.3) | 23.1 (5.4) | 0.95 (0.92-0.98, <b>p=0.004</b> ) | 0.95 (0.92-0.98, <b>p=0.004</b> ) |
| Insurance Type   | Unknown                | 16 (94.1)  | 1 (5.9)    | -                                 | -                                 |
|                  | Commercial             | 781 (84.3) | 145 (15.7) | 2.97 (0.60-53.82, p=0.293)        | -                                 |
|                  | Government             | 78 (83.9)  | 15 (16.1)  | 3.08 (0.56-57.59, p=0.293)        | -                                 |
| Suicide Category | Ingestion              | 580 (84.5) | 106 (15.5) | -                                 | -                                 |
|                  | Hanging/Strangulation  | 7 (70.0)   | 3 (30.0)   | 2.35 (0.50-8.58, p=0.222)         | -                                 |
|                  | Suicidal Ideation      | 95 (84.8)  | 17 (15.2)  | 0.98 (0.55-1.67, p=0.941)         | -                                 |
|                  | Other/Self Harm        | 28 (87.5)  | 4 (12.5)   | 0.78 (0.23-2.04, p=0.651)         | -                                 |
|                  | Self-Harm not Apparent | 165 (84.2) | 31 (15.8)  | 1.03 (0.66-1.57, p=0.901)         | -                                 |
| Weekday/Weekend  | Weekday                | 662 (84.2) | 124 (15.8) | -                                 | -                                 |
|                  | Weekend                | 213 (85.2) | 37 (14.8)  | 0.93 (0.62-1.37, p=0.711)         | -                                 |
| School Session   | School Year            | 674 (85.8) | 112 (14.2) | -                                 | -                                 |
|                  | Summer Vacation        | 201 (80.4) | 49 (19.6)  | 1.47 (1.01-2.12, <b>p=0.043</b> ) | -                                 |
| Season           | High Season            | 276 (80.0) | 69 (20.0)  | -                                 | -                                 |
|                  | Low Season             | 599 (86.7) | 92 (13.3)  | 0.61 (0.44-0.87, <b>p=0.005</b> ) | 0.62 (0.43-0.91, <b>p=0.013</b> ) |
| Time of Day      | Night Hours            | 645 (85.9) | 106 (14.1) | -                                 | -                                 |
|                  | Office Hours           | 230 (80.7) | 55 (19.3)  | 1.46 (1.01-2.08, <b>p=0.040</b> ) | 1.41 (0.94-2.07, p=0.088)         |

|        |           |           |           |                                   |   |
|--------|-----------|-----------|-----------|-----------------------------------|---|
| Median | Mean (SD) | 51669.2   | 54187.8   | 1.00 (1.00-1.00, <b>p=0.044</b> ) | - |
| Income |           | (13855.4) | (16094.6) |                                   |   |

*Note:* Covariates in the multivariable model were selected based on a stepwise selection method. Number in dataframe = 1036, Number in model = 920, Missing = 116, AIC = 767.8, C-statistic = 0.666, H&L = Chi-sq(8) 10.94 (p=0.205). P-value of <0.05 was considered statistically significant. AIC: Akaike Information Criterion; BMI: basal metabolic index; OR: odd ratio; PICU: pediatric intensive care unit; SD: standard deviation.

166

167

The final logit model consisted of race, age, BMI, ED admission, school session, and time of day as covariates predicting PICU admission.

168

169

After controlling for all other variables in the model, Black and Hispanic patients were found to have considerably lower odds of a PICU admission when compared to Caucasian patients (OR: 0.49 and 0.17, respectively). This result is in contrast to other findings [19]. Older patients are significantly more likely to be admitted to the PICU (OR: 1.21, p = 0.005), as are patients with smaller body mass indices (OR: 0.95, p = 0.0005). Interestingly, with all other multivariable covariates being held constant, initial admission into ED significantly increases the odds of PICU admission (OR: 1.48, p = 0.039). This relationship is only marginally significant in the univariate analysis. The time of year relative to school session is also significant, with patient encounters occurring during summer vacation (June-August) having significantly higher odds of being admitted into the PICU relative to patient encounters during the school year (OR: 1.51, p = 0.044).

170

171

172

173

174

175

176

177

178

179

180

### 3.3 Temporal changes and Time-Series Decomposition

181

182

We were interested in determining the incidence of suicide over the years, over the course of seasons, and broken-down into and even lower denominator of time of day. Additive seasonal decomposition was used to assess the trend of relative PICU admission over time (Supplemental Fig 1). Simple decomposition was implemented by using the moving average to isolate the trend of relative PICU admissions, and a seasonal component was calculated by computing an average value of relative PICU admissions for each month across the entire span of the data (2011-2017). Error of the decomposition was then computed by removing the trend and seasonal components from the original time series data.

183

184

185

186

187

188

189

190

The trend for the relative PICU admissions fluctuates, with peaks in 2013 followed by a stark drop-off leading into 2014, and then a rise again in mid-2014. The seasonal components show that relative PICU admissions spike in June and August, and then again in December and January (Supplemental Table 2). These increases seem to correspond to periods in which patients are recently released from, or about to resume school after a holiday or summer vacation.

191

192

193

194

195

196

### 3.4 Spatial Relationships & Patterns

197

198

Spatial relationships were explored by creating bivariate choropleth maps of zip code geographies. Standardizing for pediatric population size of each zip code tabulation area, a moderately-strong correlation in the spatial intensity of PICU admissions and non-PICU admissions was found (Figure 2). The relative PICU admissions also correlate well with aggregate demographic and economic data from the U.S. Census Bureau, with higher relative PICU admissions correlating with increasing rural population size (Supplemental Fig 2), the percentage-increase in housing units from 2011-2017, and the percentage of family households (Supplemental Fig 4).

199

200

201

202

203

204

205

206  
207

**Figure 2.** Bivariate Choropleth Map of PICU and Non-PICU Admissions by 5-Digit Zip Code Standardized per 1,000 Students

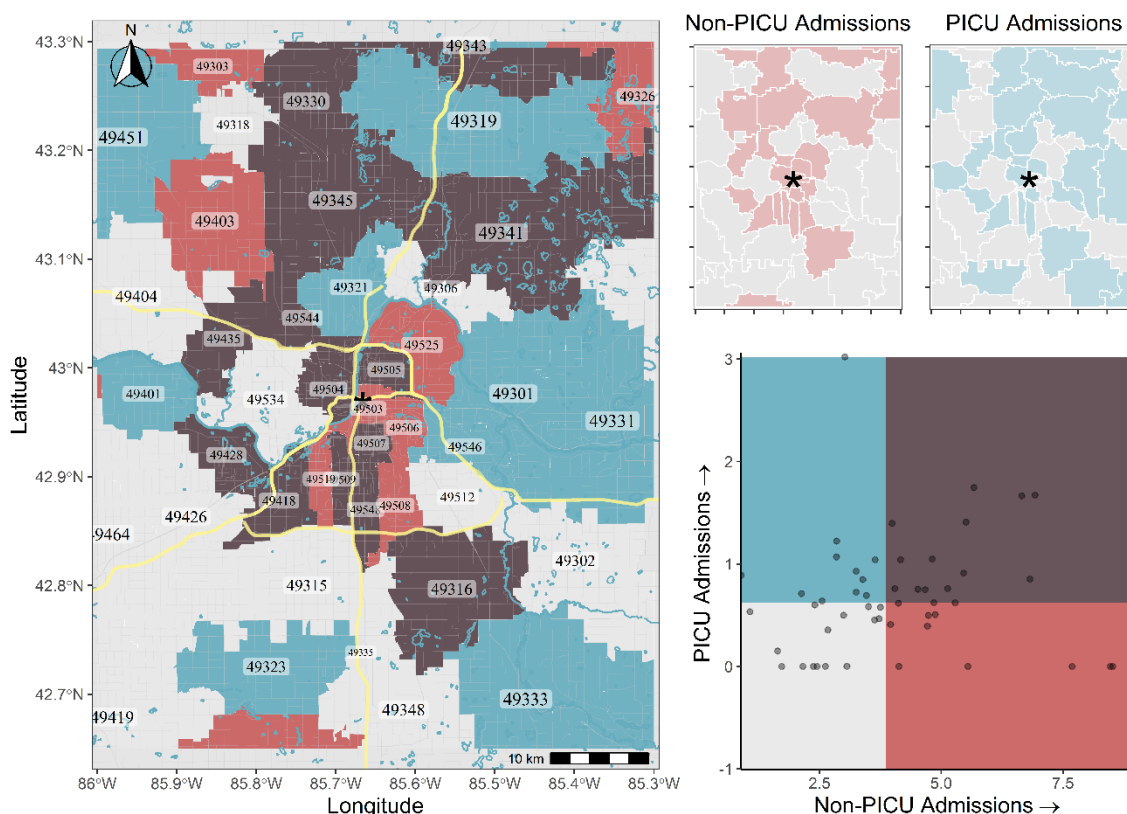

208

#### 209 4. Discussion

210 Suicidal behavior is determined by many factors, none of which are the immediate focus of  
211 medical management when the patient is admitted to the PICU. The priorities are more a  
212 determination of risk and providing aggressive measures needed to preserve life and minimize  
213 morbidity. Once the patient is stabilized in the PICU setting, patients are transferred to the in-patient  
214 floor and returned (directly or after a prolonged hospital stay) to a long-term care facility, or to the  
215 previous environment (and set of circumstances) that led to the initial behavior. Studies now show  
216 that factors such as school systems, socioeconomic and parental unemployment rates are important  
217 in determining suicide ideation, and attempted and completed suicide in children and adolescents  
218 [20-22]. In this study, we used the patients in the PICU as the high-risk group and compared them  
219 with non-ICU in-patients to extract both clinical and social variables available in the EMR to develop  
220 an understanding of SSA that includes community-based risk factors.

221 Caucasian patients had higher admission rates in our PICU (83.2 %) compared to other  
222 race/ethnic groups which is probably a reflection of race demographics in Grand Rapids, MI and the  
223 Midwest in general where the Caucasian population is over 82%. Though Caucasians have  
224 historically had a higher rate of suicide, there is recent data supporting rising rates of suicide in Black  
225 children aged 5-14 [23]. Studies show that Black adolescents have experienced an increase in rates of  
226 suicide and lasting injury caused by attempts [5].

227 In addition, we found BMI to be of significance. Patients in the PICU had significantly lower  
228 BMIs than the other patients that were hospitalized for observation. Studies have shown that a higher  
229 BMI, though associated with depression, is protective when it comes to SSA [24].

230 Proxy data in the EMR allowed us to examine the communities of our patients such as zip codes  
231 and payer data. This data, when paired with other databases such U.S. Census Bureau, gives us an  
232 understanding of potential social drivers for self-directed violence in our patients.

233 There are 248 cities in the US with a population of 100-300,000 people making up an eighth of  
234 the entire population and this list includes some of the fastest growing cities [25]. Grand Rapids, with



235 a population of 201,000, is one of these cities. We examined the areas around Grand Rapids and found  
236 that there were hotspots that could clearly be identified based on PICU suicide-related admissions.  
237 The hotspots were outside the city limits and included regions that are in rapid growth and transition.  
238 As the city becomes more urbanized, the regions on the outskirts are subject to unique stressors that  
239 need better characterizing. The areas around Grand Rapids are experiencing some of the greatest  
240 growths in population in Michigan. Kent County, which is the County Seat (governmental center) of  
241 Grand Rapids, has increased in population at rates over 9% from 2010 to 2019 [26]. Population  
242 increases will change living conditions not only in the cities themselves, but adjoining  
243 neighborhoods. Our geospatial examination has shown that suicide increases rapidly in rural and  
244 suburban areas compared to urban ones (Supplemental Fig 2). This could simply be a product of a  
245 denser pediatric population in urban regions leading to a higher denominator, and thus lower rates,  
246 or reflect a scarcity of mental health resources in these areas [3]. Additional steps need to be taken to  
247 better understand the geospatial factors around pediatric suicide.

248 Five-digit zip code-tabulation of rural/suburban areas includes large spatial heterogeneity of  
249 populations. Future work could entail assessing smaller geographic areas, such as census block-  
250 groups to gain a more granular understanding around the immediate environment from which these  
251 suicide events emerge. Meyer, et al (2016) used point-pattern modelling with aggregate demographic  
252 information obtained from small, administrative quarters in Zurich, CH in Europe, to better  
253 understand factors associated with psychiatric hospital admissions [27]. This approach could easily  
254 be adapted for assessing geographic patterns of suicide-related hospital admissions.

255 Evidence suggests that schools influence children and adolescents health behaviors for self-harm  
256 and suicide [28]. However, data exists in the EMR that allows us to examine the influence of the  
257 school year on our patients lives. We did this by applying basic time-series decomposition and found  
258 that increases in rates of PICU admissions seem to crest when schools are in recess or just about to  
259 start. We know that the nature and availability of social ties which are primarily gained from school  
260 early on, have impact on the higher functioning of adolescents. Targeted programs or interventions  
261 that originate from schools may alleviate some of the stress these patients feel at transition either from  
262 recess or getting back to school. Connecting actual suicide rates in the geographical hotspots to actual  
263 school systems is beyond the scope of this paper, as is any commentary on recommended  
264 interventions.

265 Developing an understanding of the communities is important for another reason. The most  
266 robust risk factor associated with suicide death is a previous suicide attempt [5]. A suicide attempt is  
267 a positive predictor for a completed suicide [29]. Then it becomes important to assess the  
268 communities and the support available to this child before returning him or her to that community.  
269 There may be a need to review how we think and screen for suicide in terms of age and practice, as  
270 it has been found that 45 % of suicide patients were seen in a clinical setting in the month prior to  
271 their death, versus less than half that number (19 %) who were in contact with their mental health  
272 providers [30].

273 If high risk regions are identified, then active screening by physicians and advanced  
274 practitioners in those communities may help alleviate some of the hospital admissions. In a non-  
275 ambulatory setting, the Columbia-Suicide Severity Rating Scale (C-SSRS) is the recommended  
276 method for suicide screening and risk stratification [31]. These recommendations align with the Joint  
277 Commissions National Patient Safety Goal (NPSG.15.01.01) to reduce the risk for suicide [32].  
278 Substantially more people are hospitalized as a result of nonfatal suicidal behavior than are fatally  
279 injured, with a substantial number treated in an ambulatory setting [33]. These patients are  
280 considered an *at-risk* group but could benefit from being treated as a *high-risk* group to increase the  
281 likelihood of receiving early intervention with mental health services [34]. The recommendation for  
282 suicide screening practices for patients 10 and older in Western Michigan according to the Pediatric  
283 Behavioral Health Screening Practice Excellence Workgroup of HDVCH includes: 1) in the  
284 ambulatory setting, Q9 of the Patient Health Questionnaire-9 (PHQ-9) [35,36] 2) the Columbia Suicide  
285 Severity Rating Scale (C-SSRS) with further assessment and triage stratification; any answer other  
286 than “none” is considered a positive screen on Q9 of the PHQ-9.

287 One limitation of the work is the nature of the experimental design. Future work may include  
288 a prospectively collected dataset, to avoid any selection bias in the patient population.

## 289 5. Conclusions

290 Social determinants of suicide are likely to contribute as much as, if not more than, individual  
291 risk factors, but they have been poorly studied to date. This study highlights geospatial and temporal  
292 analysis as a means of exploring community risk to develop a better understanding to assist us in  
293 providing for the mental health care needs of our communities for future interventions.

294 **Supplementary Materials:** Figure S1: Trend of relative PICU admission over time; Table S1: Data Dictionary;  
295 Figure S2: Higher Relative PICU Admissions Correlating with Increases Rural Population Size; Table S2:  
296 Median relative frequency of PICU admissions for each month, accompanied by seasonal decomposition;  
297 Figure S3: Standardized PICU and non-PICU Admissions Relative to Housing; Figure S4: Standardized  
298 PICU and non-PICU Admissions Relative to Family Households.

299 **Author Contributions:** Conceptualization, S.R. and M.L-L.; methodology, A.K., S.R. and M.L-L.; software, A.K.;  
300 validation, A.K.; formal analysis, S.R., A.K.; investigation, S.R., A.K., A.B., M.L-L.; resources, B.E.; data curation,  
301 M.O., A.H., A.M.E.V.; writing—original draft preparation, A.K., M.O., A.M.E.V., B.E., A.H., A.B., M.L-L., S.R.;  
302 writing—review and editing, A.K., M.O., A.M.E.V., B.E., A.H., A.B., M.L-L., S.R.; visualization, A.K., S.R.;  
303 supervision, S.R., M.L-L.; project administration, B.E., M.L-L.; funding acquisition, N/A. All authors have read  
304 and agreed to the published version of the manuscript.

305 **Funding:** This research received no external funding.

306 **Acknowledgments:** The authors would like to thank the PICU staff at Helen DeVos Children’s Hospital for their  
307 support in the completion of this study and various contributions, and the Pediatric Behavioral Health Screening  
308 Practice Excellence Workgroup: Kiran Taylor MD, Division Chief, Psychiatry and Behavioral Medicine  
309 (Sponsor), Jennifer Bowden, MD, Hannah Jaworski, MD, Lisa Lowery, MD, Phillip Waalkes, DO, Jody Sprague,  
310 LMSW, Erica Auger, LMSW, Scott Stebbins, LMSW, Sarah Pentoney LMSW, Ashleigh Nurski, MSN, Ian  
311 Straayer, Laura Stuursma, MBA, Drew Peklo, MSN, Christina Pries, DNP, Stephanie Mullennix, MSN, and Beth  
312 Kuik, LMSW. The authors would also like to thank Jessica Parker, MS, for her contributions in initiating the data  
313 acquisition and statistical summaries.

314 **Conflicts of Interest:** The authors declare no conflict of interest.

## 315 References

- 316 1. Crosby, A.E.; Ortega, L.; Melanson, C. Self-directed Violence Surveillance: Uniform Definitions and  
317 Recommended Data Elements, Version 1.0. Control, N.C.f.I.P.a., Ed. Centers for Disease Control and  
318 Prevention: Atlanta (GA), 2011.
- 319 2. Gvion, Y.; Levi-Belz, Y. Serious Suicide Attempts: Systematic Review of Psychological Risk Factors.  
320 *Front Psychiatry* **2018**, *9*, 56, doi:10.3389/fpsy.2018.00056.
- 321 3. Kegler, S.R.; Stone, D.M.; Holland, K.M. Trends in Suicide by Level of Urbanization - United States,  
322 1999-2015. *MMWR Morb Mortal Wkly Rep* **2017**, *66*, 270-273, doi:10.15585/mmwr.mm6610a2.
- 323 4. Patton, G.C.; Coffey, C.; Sawyer, S.M.; Viner, R.M.; Haller, D.M.; Bose, K.; Vos, T.; Ferguson, J.; Mathers,  
324 C.D. Global patterns of mortality in young people: a systematic analysis of population health data.  
325 *Lancet* **2009**, *374*, 881-892, doi:10.1016/S0140-6736(09)60741-8.
- 326 5. Curtin, S.C.; Warner, M.; Hedegaard, H. Increase in Suicide in the United States, 1999-2014. *NCHS Data*  
327 *Brief* **2016**, 1-8.
- 328 6. Fontanella, C.A.; Hiance-Steelesmith, D.L.; Phillips, G.S.; Bridge, J.A.; Lester, N.; Sweeney, H.A.;  
329 Campo, J.V. Widening rural-urban disparities in youth suicides, United States, 1996-2010. *JAMA*  
330 *pediatrics* **2015**, *169*, 466-473, doi:10.1001/jamapediatrics.2014.3561.
- 331 7. Joe, S.; Banks, A.; Belue, R. Suicide risk among urban children. *Children and Youth Services Review* **2016**,  
332 *68*, 73-79, doi:<https://doi.org/10.1016/j.childyouth.2016.07.002>.

- 333 8. Woo, J.-M.; Okusaga, O.; Postolache, T.T. Seasonality of suicidal behavior. *Int J Environ Res Public Health*  
334 **2012**, *9*, 531-547, doi:10.3390/ijerph9020531.
- 335 9. Pollack, M.M.; Patel, K.M.; Ruttimann, U.E. PRISM III: an updated Pediatric Risk of Mortality score.  
336 *Crit Care Med* **1996**, *24*, 743-752.
- 337 10. Slater, A.; Shann, F.; Pearson, G.; Paediatric Index of Mortality Study, G. PIM2: a revised version of the  
338 Paediatric Index of Mortality. *Intensive Care Med* **2003**, *29*, 278-285, doi:10.1007/s00134-002-1601-2.
- 339 11. Venables, W.N.; Ripley, B.D. *Modern Applied Statistics with S*, 4th Edition ed.; Springer: New York, 2002.
- 340 12. Bureau, U.S.C. American Community Survey, 2016 American Community Survey 5-Year Estimates,  
341 Table DP02. Andy Kampfschulte: HDVCH, 2019; p using American FactFinder.
- 342 13. Harrison, E.; Drake, T.; Ots, R. *finalfit: Quickly Create Elegant Regression Tables and Plots when Modelling*  
343 *R*, 2019.
- 344 14. Team, R.C. *R: A language and environment for statistical computing*, Vienna, Austria, 2018.
- 345 15. Walker, K. *tigris: Load Census TIGER/Line Shapefiles*, 2018.
- 346 16. Manson, S.; Schroeder, J.; Van Riper, D.; Ruggles, S. IPUMS National Historical Geographic Information  
347 System: Version 14.0. Minneapolis, MN: IPUMS., 2019; <http://doi.org/10.18128/D050.V14.0>.
- 348 17. Prener C; Grossenbacher, T.; Zehr, A.; Stevens, J. *Tools and Palettes for Bivariate Thematic Mapping*, 2020.
- 349 18. Wickham, H. *ggplot2: Elegant Graphics for Data Analysis*, Springer: Verlag, New York, 2016.
- 350 19. Lindsey, M.A.; Sheftall, A.H.; Xiao, Y.; Joe, S. Trends of Suicidal Behaviors Among High School  
351 Students in the United States: 1991-2017. *Pediatrics* **2019**, *144*, doi:10.1542/peds.2019-1187.
- 352 20. Fang, M. School poverty and the risk of attempted suicide among adolescents. *Social psychiatry and*  
353 *psychiatric epidemiology* **2018**, *53*, 955-967, doi:10.1007/s00127-018-1544-8.
- 354 21. Benbenishty, R.; Astor, R.A.; Roziner, I. A School-Based Multilevel Study of Adolescent Suicide  
355 Ideation in California High Schools. *J Pediatr* **2018**, *196*, 251-257, doi:10.1016/j.jpeds.2017.12.070.
- 356 22. Aleck, O.; Stefania, M.; James, T.; James, D.; Ruth, H.; Lisa, C.; Amber, L.; Clyde, H. The impact of  
357 fathers' physical and psychosocial work conditions on attempted and completed suicide among their  
358 children. *BMC public health* **2006**, *6*, 77, doi:10.1186/1471-2458-6-77.
- 359 23. Bridge, J.A.; Horowitz, L.M.; Fontanella, C.A.; Sheftall, A.H.; Greenhouse, J.; Kelleher, K.J.; Campo, J.V.  
360 Age-Related Racial Disparity in Suicide Rates Among US Youths From 2001 Through 2015. *JAMA*  
361 *Pediatr* **2018**, *172*, 697-699, doi:10.1001/jamapediatrics.2018.0399.
- 362 24. Bjørngaard, J.H.; Carslake, D.; Lund Nilsen, T.I.; Linthorst, A.C.; Davey Smith, G.; Gunnell, D.;  
363 Romundstad, P.R. Association of Body Mass Index with Depression, Anxiety and Suicide-An  
364 Instrumental Variable Analysis of the HUNT Study. *PLoS One* **2015**, *10*, e0131708,  
365 doi:10.1371/journal.pone.0131708.
- 366 25. Resident Population Estimates for the 100 Fastest-Growing U.S. Counties with 10,000 or More  
367 Population in 2010: April 1, 2010 to July 1, 2019 (CO-EST2019-CUMGR) U.S. Census Bureau.: 2020;  
368 <https://www.census.gov/data/tables/time-series/demo/popest/2010s-counties-total.html>.
- 369 26. Cumulative Estimates of Resident Population Change and Rankings for Counties in Michigan: April 1,  
370 2010 to July 1, 2019 (CO-EST2019-CUMCHG-26). U.S. Census Bureau.: 2020;  
371 <https://www.census.gov/data/tables/time-series/demo/popest/2010s-counties-total.html>.
- 372 27. Meyer, S.; Warnke, I.; Rössler, W.; Held, L. Model-based testing for space-time interaction using point  
373 processes: An application to psychiatric hospital admissions in an urban area. *Spatial and Spatio-temporal*  
374 *Epidemiology* **2016**, *17*, 15-25, doi:<https://doi.org/10.1016/j.sste.2016.03.002>.

- 375 28. Evans, R.; Hurrell, C. The role of schools in children and young people's self-harm and suicide:  
376 systematic review and meta-ethnography of qualitative research. *BMC public health* **2016**, *16*, 401,  
377 doi:10.1186/s12889-016-3065-2.
- 378 29. Bostwick, J.M.; Pabbati, C.; Geske, J.R.; McKean, A.J. Suicide Attempt as a Risk Factor for Completed  
379 Suicide: Even More Lethal Than We Knew. *Am J Psychiatry* **2016**, *173*, 1094-1100,  
380 doi:10.1176/appi.ajp.2016.15070854.
- 381 30. Luoma, J.B.; Martin, C.E.; Pearson, J.L. Contact with mental health and primary care providers before  
382 suicide: a review of the evidence. *Am J Psychiatry* **2002**, *159*, 909-916, doi:10.1176/appi.ajp.159.6.909.
- 383 31. Posner, K.; Brown, G.K.; Stanley, B.; Brent, D.A.; Yershova, K.V.; Oquendo, M.A.; Currier, G.W.; Melvin,  
384 G.A.; Greenhill, L.; Shen, S., et al. The Columbia-Suicide Severity Rating Scale: initial validity and  
385 internal consistency findings from three multisite studies with adolescents and adults. *Am J Psychiatry*  
386 **2011**, *168*, 1266-1277, doi:10.1176/appi.ajp.2011.10111704.
- 387 32. Commission, T.J. R3 Report Issue 18: National Patient Safety Goal (NPSG) 15.01.01 for suicide  
388 prevention. 2019; [https://www.sprc.org/resources-programs/r3-report-issue-18-national-patient-  
389 safety-goal-suicide-  
390 prevention#:~:text=R3%20Report%20Issue%2018%3A%20National%20Patient%20Safety%20Goal,who  
391 %20are%20identified%20as%20high%20risk%20for%20suicide.](https://www.sprc.org/resources-programs/r3-report-issue-18-national-patient-safety-goal-suicide-prevention#:~:text=R3%20Report%20Issue%2018%3A%20National%20Patient%20Safety%20Goal,who%20are%20identified%20as%20high%20risk%20for%20suicide.)
- 392 33. Crosby, A.E.; Han, B.; Ortega, L.A.; Parks, S.E.; Gfroerer, J.; Centers for Disease, C.; Prevention. Suicidal  
393 thoughts and behaviors among adults aged  $\geq 18$  years--United States, 2008-2009. *MMWR Surveill*  
394 *Summ* **2011**, *60*, 1-22.
- 395 34. Sheftall, A.H.; Asti, L.; Horowitz, L.M.; Felts, A.; Fontanella, C.A.; Campo, J.V.; Bridge, J.A. Suicide in  
396 Elementary School-Aged Children and Early Adolescents. *Pediatrics* **2016**, *138*, doi:10.1542/peds.2016-  
397 0436.
- 398 35. Na, P.J.; Yaramala, S.R.; Kim, J.A.; Kim, H.; Goes, F.S.; Zandi, P.P.; Vande Voort, J.L.; Sutor, B.; Croarkin,  
399 P.; Bobo, W.V. The PHQ-9 Item 9 based screening for suicide risk: a validation study of the Patient  
400 Health Questionnaire (PHQ)-9 Item 9 with the Columbia Suicide Severity Rating Scale (C-SSRS). *J Affect*  
401 *Disord* **2018**, *232*, 34-40, doi:10.1016/j.jad.2018.02.045.
- 402 36. Gilbody, S.; Richards, D.; Brealey, S.; Hewitt, C. Screening for depression in medical settings with the  
403 Patient Health Questionnaire (PHQ): a diagnostic meta-analysis. *J Gen Intern Med* **2007**, *22*, 1596-1602,  
404 doi:10.1007/s11606-007-0333-y.

405
